# Supplementary material
Source: PubMed Central journal article supplement (PMC8112734)
Supplement: NIHMS1686817-supplement-The_phenomenon_of_summer_diarrhea_and_its_waning__1910-1930_appendix.pdf [file NIHMS1686817-supplement-The_phenomenon_of_summer_diarrhea_and_its_waning__1910-1930_appendix.pdf]

## **Appendix**

For Online Publication

**Appendix Figure 1. Ratio of Diarrheal Mortality to Total Mortality among Children Under the Age of Two**

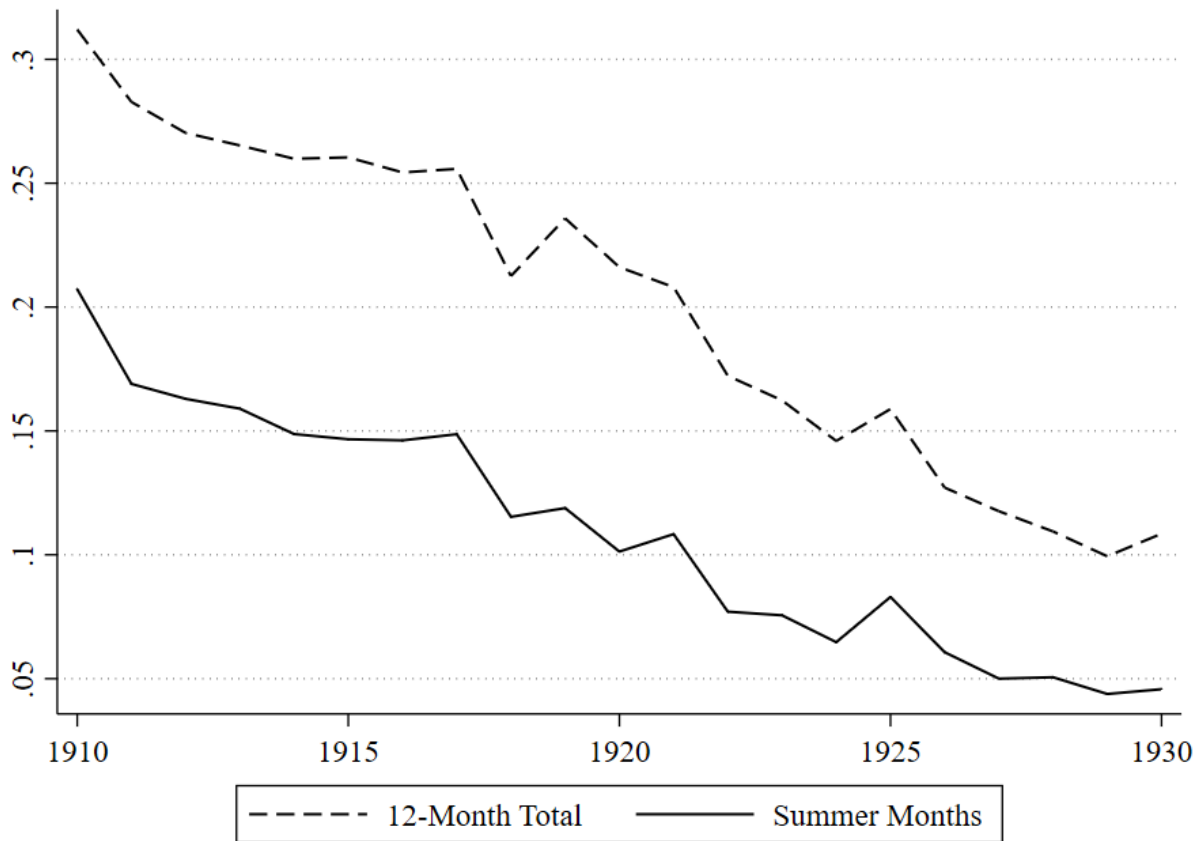

Notes: Based on data from *Mortality Statistics* for the 26 cities under study, published by the U.S. Census Bureau. The summer months are defined as June-September.

**Appendix Figure 2. Ratio of Summer Diarrheal Mortality to Total Diarrheal Mortality among Children Under the Age of Two**

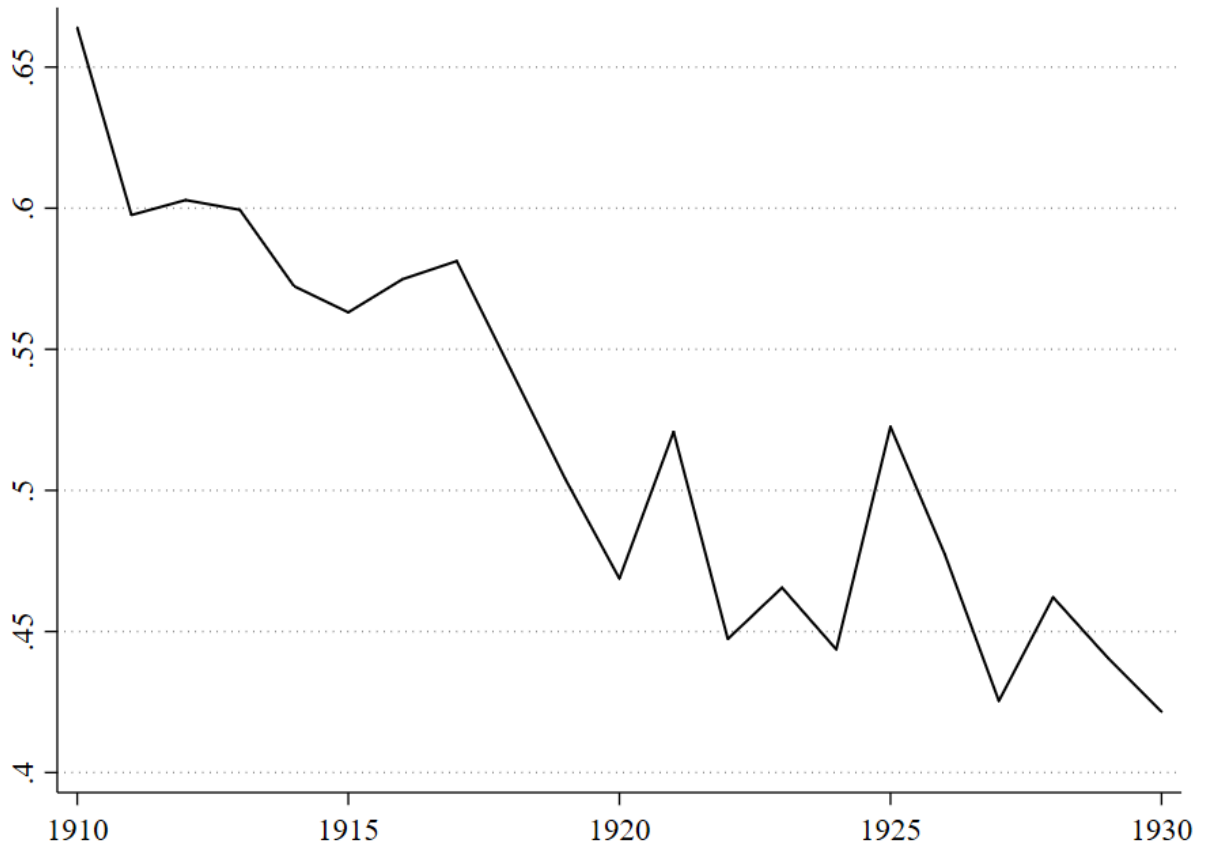

Notes: Based on data from *Mortality Statistics* for the 26 cities under study, published by the U.S. Census Bureau. The summer months are defined as June-September.

**Appendix Figure 3. Diarrheal Mortality among Children Under the Age of Two per 100,000 Population**

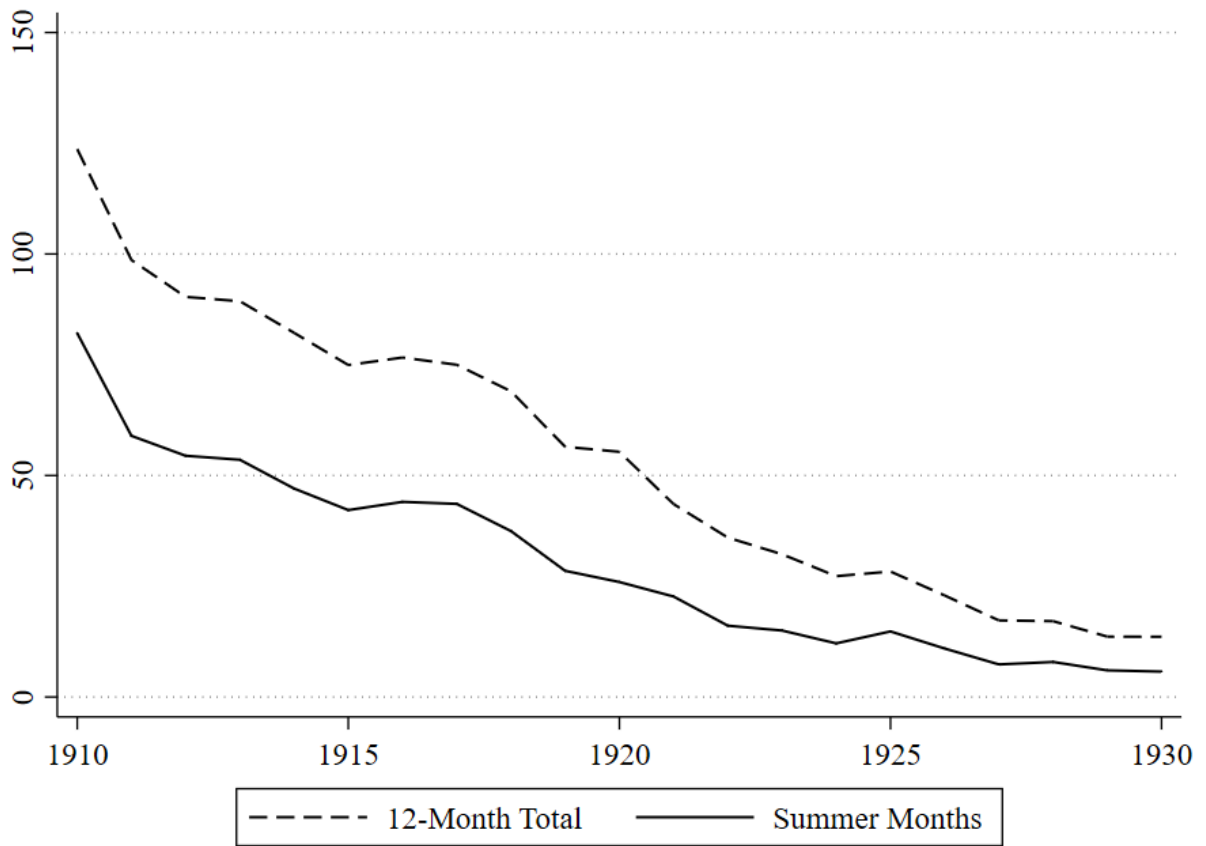

Notes: Based on data from *Mortality Statistics* for the 26 cities under study, published by the U.S. Census Bureau. The summer months are defined as June through September.

**Appendix Figure 4. Actual vs. Predicted Non-Summer Diarrheal Mortality Rates among Children Under the Age of Two**  
The Effect of Municipal Water Filtration

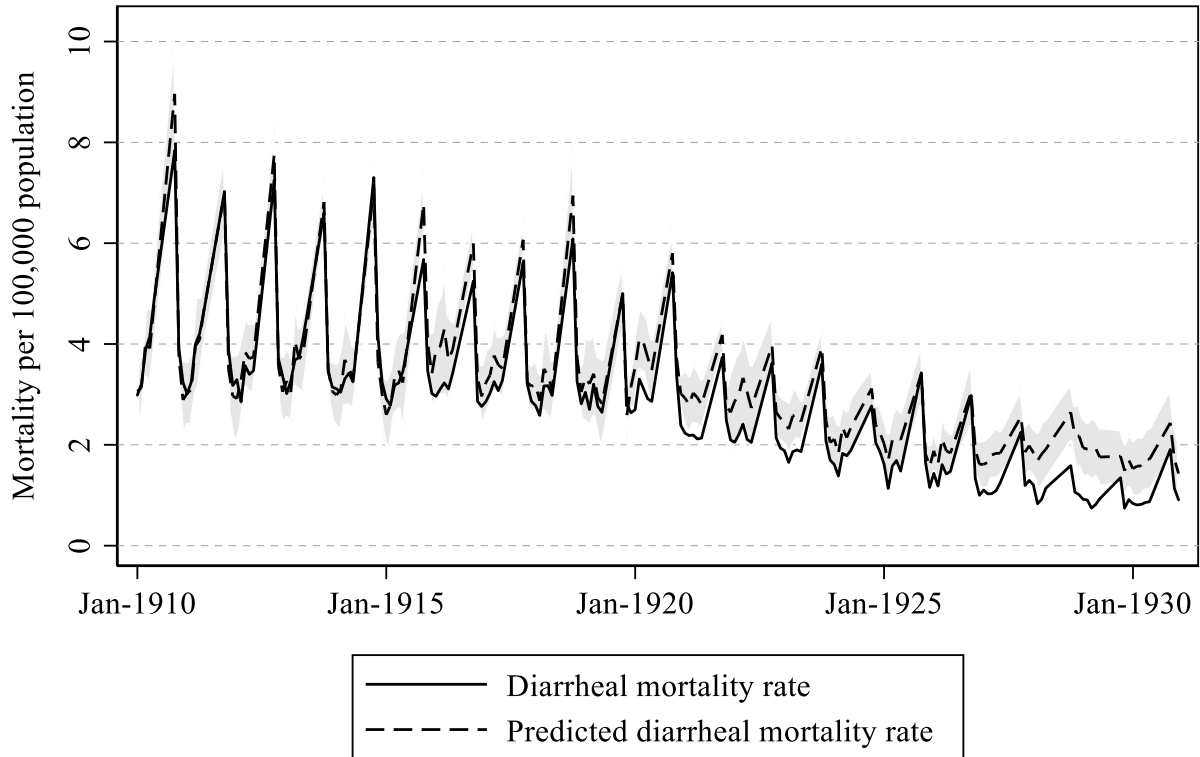

Notes: Based on annual data from *Mortality Statistics* for the period 1910-1930, published by the U.S. Census Bureau. Predicted diarrheal mortality rates are calculated under the assumption that municipalities did not filter their water supply. Shaded area represents 90% confidence region around diarrheal mortality rates.

---

**Appendix Table 1. Descriptive Statistics**

---

|                            | Mean<br>(SD)   | Description                                                                            |
|----------------------------|----------------|----------------------------------------------------------------------------------------|
| <i>Diarrhea</i>            | 4.08<br>(5.16) | Monthly diarrheal mortality per 100,000 population among children under the age of two |
| <i>ln(Population)</i>      | 13.2<br>(.762) | Natural log of the city population                                                     |
| <i>Percent Female</i>      | .500<br>(.018) | Percent of the city population that was female                                         |
| <i>Percent Nonwhite</i>    | .072<br>(.072) | Percent of the city population that was nonwhite                                       |
| <i>Percent Foreign</i>     | .212<br>(.096) | Percent of the city population that was foreign born                                   |
| <i>Percent Age &lt; 15</i> | .253<br>(.031) | Percent of the city population that was less than 15 years of age                      |
| <i>Percent Age 15-44</i>   | .529<br>(.025) | Percent of the city population that was 15-44 years of age                             |
| <i>Percent Age 45+</i>     | .218<br>(.030) | Percent of the city population that was 45 years of age or older                       |

---

N = 6,552

---

Notes: Unweighted means with standard deviations in parentheses.

**Appendix Table 2. Municipal Water Purification, 1900-1930**

| City and State             | Water Filtration Plant <sup>a</sup> | Water Treated with Chlorine <sup>b</sup> |
|----------------------------|-------------------------------------|------------------------------------------|
| Baltimore, Maryland        | 1915                                | 1911                                     |
| Boston, Massachusetts      | ...                                 | 1928                                     |
| Buffalo, New York          | 1926                                | 1914                                     |
| Chicago, Illinois          | ...                                 | 1912                                     |
| Cincinnati, Ohio           | 1907                                | 1918                                     |
| Cleveland, Ohio            | 1918                                | 1911                                     |
| Detroit, Michigan          | 1923                                | 1913                                     |
| Indianapolis, Indiana      | 1904                                | 1909                                     |
| Jersey City, New Jersey    | ...                                 | 1908                                     |
| Kansas City, Missouri      | 1928                                | 1911                                     |
| Los Angeles, California    | ...                                 | 1925                                     |
| Louisville, Kentucky       | 1909                                | 1913                                     |
| Milwaukee, Wisconsin       | ...                                 | 1910                                     |
| Minneapolis, Minnesota     | 1913                                | 1910                                     |
| Newark, New Jersey         | ...                                 | 1921                                     |
| New Orleans, Louisiana     | 1909                                | 1915                                     |
| New York, New York         | ...                                 | 1911                                     |
| Philadelphia, Pennsylvania | 1906                                | 1910                                     |
| Pittsburgh, Pennsylvania   | 1908                                | 1910                                     |
| Providence, Rhode Island   | 1904                                | 1917                                     |
| Rochester, New York        | ...                                 | 1925                                     |
| San Francisco, California  | ...                                 | 1922                                     |
| Seattle, Washington        | ...                                 | 1911                                     |
| St. Louis, Missouri        | 1915                                | 1913                                     |
| St. Paul, Minnesota        | 1923                                | 1920                                     |
| Washington, D.C.           | 1905                                | 1923                                     |

<sup>a</sup> **Philadelphia, PA:** Filtration began before 1906, but not all parts of the city received filtered water until February, 1909. **Pittsburgh, PA:** By October 1908, the water supply of peninsular Pittsburgh was being filtered. In 1909 and 1914, the Southside and the Northside, respectively, began receiving filtered water.

<sup>b</sup> **Chicago, IL:** Chlorination began in 1912, but full chlorination was not achieved until 1917. **Milwaukee, WI:** Water was chlorinated from June, 1910-December, 1910; February, 1912-March 1912; April, 1912 onwards. **Newark, NJ:** Chlorine was used in rare, emergency-only cases beginning in 1913; continuous use started in 1921. **Philadelphia, PA:** Water was chlorinated from December, 1910-April, 1911; December, 1911-February, 1913; November, 1913 onwards. **Pittsburgh, PA:** Water was chlorinated from January, 1910-March, 1910; November, 1910-April, 1911; August, 1911 onwards.

Notes: Identification of the filtration estimates comes from cities that began filtering their water supply during the period 1910-1930. Identification of the chlorination estimates comes from cities that began chlorinating their water supply during the period 1910-1930.

**Appendix Table 3. Clean Water Projects, 1900-1930**

| City and State           | Clean Water Project | Description                                                                                                                                         |
|--------------------------|---------------------|-----------------------------------------------------------------------------------------------------------------------------------------------------|
| Boston, Massachusetts    | 1904                | Water was conveyed by the Wachusett/Weston Aqueduct to the Weston Reservoir. Water was first delivered to metropolitan Boston on December 29, 1904. |
| Buffalo, New York        | 1913                | Water intake, located on Lake Erie's Emerald Channel, was completed on May 12, 1913.                                                                |
| Cleveland, Ohio          | 1904                | Cleveland built the first tunnel (the "Five Mile Crib") to draw water from Lake Erie. It went into operation on April 6, 1904.                      |
| Jersey City, New Jersey  | 1904                | The Boonton Reservoir began delivering water to Jersey City on May 23, 1904.                                                                        |
| Los Angeles, California  | 1913                | Los Angeles began receiving water from Owens Valley on November 5, 1913.                                                                            |
| Newark, New Jersey       | 1930                | The Wanaque Reservoir began delivering water to Newark on March 20, 1930.                                                                           |
| New York, New York       | 1907                | The New Croton Dam was completed on January 1, 1907 and began delivering water to New York City on November 6, 1907.                                |
|                          |                     | The Catskills Aqueduct began delivering water to the Bronx on December 27, 1915. By January 22, 1917, all other boroughs were receiving water.      |
| Providence, Rhode Island | 1926                | The Scituate Reservoir began delivering water to Providence on September 30, 1926.                                                                  |

Notes: Identification of the clean water estimates comes from the cities that undertook clean water projects during the period 1910-1930.



**Appendix Table 4. Sewage Treatment/Diversion, 1900-1930**

| City and State           | Sewage Treatment Plant/Sewage Diversion | Description                                                                                                                                                                        |
|--------------------------|-----------------------------------------|------------------------------------------------------------------------------------------------------------------------------------------------------------------------------------|
| Baltimore, Maryland      | 1911                                    | Operation of the sewage treatment plant was begun “in the latter part of 1911” (Wagenhals et al. 1925).                                                                            |
| Chicago, Illinois        | 1907                                    | In 1907, the last sewer outfalls emptying into Lake Michigan were shut off.                                                                                                        |
| Cleveland, Ohio          | 1922                                    | The first sewage treatment plant was opened in 1922. By 1928, two additional plants were in operation.                                                                             |
| Detroit, Michigan        | 1912                                    | The Detroit River Interceptor was built in 1912. It intercepted sewage and discharged it below the intake for drinking water. Detroit began treating its sewage in February, 1940. |
| Indianapolis, Indiana    | 1925                                    | The sewage treatment plant began operations in May, 1925.                                                                                                                          |
| Jersey City, New Jersey  | 1924                                    | The sewage treatment plant was built in 1924 and upgraded in 1937.                                                                                                                 |
| Milwaukee, Wisconsin     | 1925                                    | The sewage treatment plant began operations in June, 1925.                                                                                                                         |
| Newark, New Jersey       | 1924                                    | The sewage treatment plant began operations in 1924.                                                                                                                               |
| Providence, Rhode Island | 1901                                    | The Providence sewage treatment plant, built in 1901, used chemical precipitation. It converted to using an activated sludge process in the mid-1930s.                             |
| Rochester, New York      | 1917                                    | The sewage treatment plant began operations in March, 1917                                                                                                                         |

Notes: Identification of the sewage treatment estimates comes from the cities that began treating their sewage during the period 1910-1930.

## Sources for Appendix Tables 2-4

### **Baltimore, Maryland**

Hendrickson, Martha A. 2012. "The Montebello Water Filtration Plant I: Clean Water for City & Suburb Alike." *History Trails*, 43(3-4): 1-20.

Jennings, C.A. 1918. "Some Results Secured by Chlorine Compounds in Water Purification and Sewage Treatment." *City Engineering*, LV(1): 249-251.

Wagenhals, H.H., E.J. Theriault and H.B. Hommon. 1925. Report on the Study of Fifteen Representative Sewage Treatment Plants. Washington, D.C.: Government Printing Office.

### **Boston, Massachusetts**

Castellon, Cynthia M. 2008. "Disinfection Byproduct (DBP) Precursors in Central MA." Environmental & Water Resources Engineering Masters Projects, University of Massachusetts-Amherst.

Mohlman, F. W. 1940. "Sewage Treatment in Large American Cities." *Sewage Works Journal*, 12(1): 168-171.

Ropes, Horace. 1904. "Westin Aqueduct Department". In the *Third Annual Report of the Metropolitan Water and Sewage Board* (Public Document 57). Boston, MA: Wright and Potter Printing Company, pp. 113-136.

### **Buffalo, New York**

Andrews, George C. 1927. "The Buffalo Water Works." *Journal of the American Water Works Association*, 17(3): 279-290.

Fronczak, Francis E. 1915. "Reduction in Typhoid." *Buffalo Sanitary Bulletin*, 8(8): 85-86.

Mohlman, F. W. 1940. "Sewage Treatment in Large American Cities." *Sewage Works Journal*, 12(1): 168-171.

Rossi, Mary C. 1995. "The History of Sewage Treatment in the City of Buffalo, New York." *Middle States Geographer*, 28: 9-19.

### **Chicago, Illinois**

Baylis, John R. 1949. "Chicago South District Filtration Plant." *Journal of the American Water Works Association*, 41(7): 599-615.

Cain, Louis P. 1978. *Sanitation Strategy for a Lakefront Metropolis: The Case of Chicago*. DeKalb, IL: Northern Illinois University Press.

Gustaitis, Joseph. 2013. *Chicago's Greatest Year, 1893: The White City and the Birth of a Modern Metropolis*. Carbondale, IL: Southern Illinois University Press.

Hering, Rudolph and George W. Fuller. 1907. "Sewage Disposal at Chicago and Vicinity." *Engineering Record*, 55(5): 130-134.

Jennings, C. A. 1923. "The Disinfection of Public Water Supplies and its Relation to Public Health." *Journal of the American Water Works Association*, 10(1): 127-138.

Melosi, Martin. 2008. *The Sanitary City: Environmental Services in Urban America from Colonial Times to the Present*. Pittsburgh, PA: University of Pittsburgh Press.

### **Cincinnati, Ohio**

Cutler, David M. and Grant Miller. 2005. "The Role of Public Health Improvements in Health Advances: The Twentieth-Century United States." *Demography*, 42(1): 1-22.

Eddy, Harrison P. 1913. "Report upon Necessity and Feasibility of Treating the Sewage of Cincinnati before its Discharge into the Ohio River." *Progress Report on a Plan of Sewerage for the City of Cincinnati*. Department of Public Works, Cincinnati, OH, pp. 295-610.

Mohlman, F. W. 1940. "Sewage Treatment in Large American Cities." *Sewage Works Journal*, 12(1): 168-171.

### **Cleveland, Ohio**

Ellms, J. W. and John J. Wirts. 1943. "Sewage Treatment Problems in Cleveland, Ohio." *Sewage Works Journal*, 15(1): 40-47.

Hyde, Charles Gilman, George H. Wilhelm and Frank C. Miller. 1916. *A Report Upon Possible Sources of Water Supply for the City of Sacramento*. Sacramento, CA: Rincon Publishing Company, Printers.

Ohio (state). 1913. *Twenty Seventh Annual Report of the State Board of Health*. Columbus, Ohio: F.J. Heer Printing Company, pp. 623-633.

Orth, Samuel Peter. 1910. *A History of Cleveland, Ohio, Volume 1*. Chicago-Cleveland: S.J. Clarke Publishing Company.

Perkins, Roger G. 1921. "Typhoid Fever in Cleveland Ohio for the Years 1918, 1919, and 1920" *Public Health Reports*, 36(20): 1095-1132.

Stradling, David and Richard Stradling. 2015. *Where the River Burned: Carl Stokes and the Struggle to Save Cleveland*. Ithaca, NY: Cornell University Press.

### **Detroit, Michigan**

Detroit Water and Sewerage Department. 2002. *Detroit Water and Sewerage Department: The First 300 Years* (Daisy, Michael, editor). Detroit, MI: Detroit Water and Sewerage Department.

Jennings, C.A. 1918. "Some Results Secured by Chlorine Compounds in Water Purification and Sewage Treatment." *Municipal Engineering*, LV(1): 249-251.

### **Indianapolis, Indiana**

Calvert, C.K. 1934. "The Sanitary Works of Indianapolis." *American Journal of Public Health*, 24(7): 739-742.

Jordan, H.E. 1909. "Preliminary Chemical Treatment as an Aid to Slow Sand Filtration; Indianapolis Water Company." *Engineering News*, 66(6): 144-148.

Mabee, W.C. 1909. "Concrete in Waterworks Construction." *Fire and Water Engineering*, 46: 242-244.

Unknown Author. 1919. "Disinfection of Water Supplies." *Municipal Journal and Public Works*, 46(24): 437-439 and 444.

### **Jersey City, New Jersey**

Jennings, C.A. 1918. "Some Results Secured by Chlorine Compounds in Water Purification and Sewage Treatment." *Municipal Engineering*, LV(1): 249-251.

Leith, Rodney B. 1972. "Jersey City Gives Up its Sewage Treatment Plant." *New York Times*, April 30. Available at: <https://www.nytimes.com/1972/04/30/archives/jersey-city-gives-up-its-sewagetreatment-plant.html>.

McGuire, Michael J. 2013. *The Chlorine Revolution: Water Disinfection and the Fight to Save Lives*. Denver, CO: American Water Works Association.

Stoddard, Andrew, Jon B. Harcum, Jonathan T. Simpson, James R. Pagenkopf and Robert K. Bastian. 2002. *Municipal Wastewater Treatment: Evaluating Improvements in National Water Quality*. New York, NY: John Wiley and Sons.

### **Kansas City, Missouri**

Bullard, Loring. 2010. *Source to Tap: A History of Missouri's Public Water Supplies*. Available at: <http://www.watershedcommittee.org/wp-content/uploads/2010/08/copy-of-copy-of-source-to-tapfinal.pdf>.

Hyde, Charles Gilman, George H. Wilhelm and Frank C. Miller. 1916. *A Report Upon Possible Sources of Water Supply for the City of Sacramento*. Sacramento, CA: Rincon Publishing Company, Printers.

Mohlman, F. W. 1940. "Sewage Treatment in Large American Cities." *Sewage Works Journal*, 12(1): 168-171.

Samuel, T.D. 1930. "The Water Supply System of Kansas City Missouri." *Journal of the American Water Works Association*, 22(9): 1236-1246.

### **Los Angeles, California**

Feldman, David Lewis. 2017. *The Water-Sustainable City: Science, Policy and Practice*. Northampton, MA: Edward Elgar Publishing.

Goudey, R.F. 1935. "Chlorination of Los Angeles Water Supply." *American Journal of Public Health*, 25(6): 730–734.

Hanak, Ellen, Jay Lund, Ariel Dinar, Brian Gray, Richard Howitt, Jeffry Mount, Peter Moyle, and Barton Thompson. 2011. *Managing California's Water: From Conflict to Reconciliation*. San Francisco: Public Policy Institute of California.

Prud'homme, Alex. 2012. *The Ripple Effect: The Fate of Freshwater in the Twenty-First Century*. New York, NY: Scribner Publishing.

Wilson, Carl. "To C.G. Gillespie." 24 Dec. 1951. Available at: <https://thisdayinwaterhistory.files.wordpress.com/2013/10/ladwp-letter-to-calif-health-dept-121224.pdf>.

### **Louisville, Kentucky**

Bruggers, James. 2016. "Yuk! Louisville Still has a \$943m Sewer Problem." *The Courier Journal*, October 22. Available at: <https://www.courier-journal.com/story/tech/science/environment/2016/10/22/yuck-louisville-still-has-943m-sewer-problem/87721810/>.

Gazlay, Webster. 1912. "The Louisville Water Purification Plant." *Engineering Record*, 65(26): 728.

Recktenwold, Roger. 2017. "Water and Wastewater Service for the Commonwealth of Kentucky." In *Water in Kentucky: Natural History, Communities, and Conservation* (editors Brian D. Lee, Daniel I. Carey, Alice L. Jones), Lexington, KY: University Press of Kentucky.

Unknown Author. 1911. "Louisville Waterworks Report." *Fire and Water Engineering*, 49(22): 209.

### **Milwaukee, Wisconsin**

Foss-Mollan, Kate. 2001. *Hard Water: Politics and Water Supply in Milwaukee, 1870-1995*. West Lafayette, IN: Purdue University Press.

Jennings, C. A. 1918. "Some Results Secured by Chlorine Compounds in Water Purification and Sewage Treatment." *Municipal Engineering*, LV(1): 249-251.

### **Minneapolis, Minnesota**

Cappelen, F.W. 1918. *Annual Report of the City Engineer of the City of Minneapolis for the Year Ending December 31, 1914*. Minneapolis, MN: Syndicate Printing Company.

Mohlman, F. W. 1940. "Sewage Treatment in Large American Cities." *Sewage Works Journal*, 12(1): 168-171.

National Research Council of the National Academies. 2008. *Mississippi River Water Quality and the Clean Water Act*. Washington, D.C.: National Academies Press.

Saint Paul (MN). 1938. *Annual Report of the Commissioner of Public Works*. Saint Paul, MN: Department of Public Works.

Stokes, William Royal. 1911. "A Report Concerning the Treatment of Baltimore Drinking Water with Hypochlorite of Calcium." *Maryland Medical Journal*, LIV(7): 204-214.

Unknown Author. 1917. "Chlorine Disinfection in Water-Works Plants." *Water and Gas Review*, 27(10): 17-22.

### **Newark, New Jersey**

Hendricks David. 2011. *Fundamentals of Water Treatment Unit Processes: Physical, Chemical, and Biological*. New York, NY: CRC Press.

Modica, Glenn R. 2001. *The History of the Newark Sewer System*. Cranbury, NJ: Richard Grubb & Associates.

Newark (NJ), Dept. of Streets and Public Improvements. 1922. *Annual Report*, Newark, NJ.

North Jersey District Water Supply Commission. 1950. *Wanaque and Ramapo Projects*. Wanaque, NJ.

Unknown Author. 1917. "Chlorine Disinfection in Water-Works Plants." *Water and Gas Review*, 27(10): 17-22.

Unknown Author. 1919. "Disinfection of Water Supplies." *Municipal Journal and Public Works*, 46(24): 437-439 and 444.

### **New Orleans, Louisiana**

Cutler, David M. and Grant Miller. 2005. "The Role of Public Health Improvements in Health Advances: The Twentieth-Century United States." *Demography*, 42(1): 1-22.

Porter, John L. 1909. "Operation and Maintenance Purification Stations." In the *Semi-annual Report of the Sewerage and Water Board of the City of New Orleans, La*, pp. 57-63.

Reeves, William D. 2003. *Historic Louisiana: An Illustrated History*. San Antonio, TX: Historical Publishing Network.

### **New York, New York**

Coffin, T.D.L. 1913. "Chlorinating Plants, Croton Water Supply." *Engineering News*, 69(9): 419-422.

Donaldson, Wellington. 1939. "First Year's Operation of Wards Island Sewage Treatment Works." *Sewage Works Journal*, 11(1): 100-116.

Mohlman, F. W. 1940. "Sewage Treatment in Large American Cities." *Sewage Works Journal*, 12(1): 168-171.

New York City Department of Environmental Protection. "New York City's Wastewater Treatment System." Available at: <http://www.nyc.gov/html/dep/pdf/wssystem.pdf>.

Unknown Author. 1908. "The Filling of the New Croton Reservoir." *The Engineering Review*, 18(1): 53.

### **Pittsburgh, Pennsylvania**

Cutler, David M. and Grant Miller. 2005. "The Role of Public Health Improvements in Health Advances: The Twentieth-Century United States." *Demography*, 42(1): 1-22.

Mohlman, F. W. 1940. "Sewage Treatment in Large American Cities." *Sewage Works Journal*, 12(1): 168-171.

Pittsburgh (PA), Dept. of Public Works. 1916. *The City of Pittsburgh and Its Public Works*. Pittsburgh, PA: Pittsburgh Printing Company.

### **Philadelphia, Pennsylvania**

Hendricks, David W. 2006. *Water Treatment Unit Processes: Physical and Chemical*. Boca Raton, FL: CRC Press.

McCarthy, Michael P. 1987. *Typhoid and the Politics of Public Health in Nineteenth-century Philadelphia*. Philadelphia, PA: American Philosophical Society.

Mohlman, F. W. 1940. "Sewage Treatment in Large American Cities." *Sewage Works Journal*, 12(1): 168-171.

Philadelphia (PA), 1909. *Description of the Filtration Works and Pumping Stations: Also Brief History of the Water Supply*. Philadelphia, PA: Bureau of Water.

West, Francis D. 1909. "Sanitary Control of Filter Plants." *Proceedings of the Engineers' Club of Philadelphia*, 26(2): 135-144.

West, Francis D. 1914. "Disinfecting 200,000,000 Million Gallons of Water a Day—Experience with Chloride of Lime and Liquid Chlorine at the Torresdale Filtration Plant." *Journal of the American Water Works Association*, 1(3): 403-446.

### **Providence, Rhode Island**

Bronsdon, M.H. 1919. "Operating Results of Slow-Sand Filtration Plant at Providence R.I." *Chemical Abstracts*, 13(7): 760.

Cady, John Hutchins. 1957. *The Civic and Architectural Development of Providence, 1636-1950*. Providence, RI: The Book Shop.

Nixon, Scott W. 1995. *Metal Inputs to Narragansett Bay: A History and Assessment of Recent Conditions*. Narragansett, RI: Rhode Island Sea Grant Communications Office.

Unknown Author. 1909. "Water Filters of Providence, R.I." *Municipal Journal and Engineer*, 27(3): 85-89.

### **Rochester, New York**

Baker, Frank Collins. 1920. "Animal Life and Sewage in the Genesee River, New York." *The American Naturalist*, 54(631): 152-161.

McKelvey, Blake. 1972. "Water for Rochester." *Rochester History*, 34(3): 1-24.

Rochester (City of), Department of Environmental Services, Bureau of Water. 2013. *A Pocket History of the Rochester Water Works*, Rochester New York.

### **San Francisco, California**

Environmental Protection Agency, Office of Enforcement. 1975. *Evaluation of Sewage Treatment Facilities San Francisco, California September 1975*. EPA-330/2-75-008, San Francisco, CA.

Hanson, Warren D. 2005. *A History of the Municipal Water Department and Hetch Hetchy System*. San Francisco, CA: San Francisco Public Utilities Commission.

Hassler, William C. 1930. "Typhoid Fever Epidemic Occurring During the Summer of 1928." *American Journal of Public Health*, 20(2): 137-146.

Schussler, Hermann. 1906. *The Water Supply of San Francisco, California, Before, During and After the Earthquake of April 18th, 1906, and the Subsequent Conflagration*. New York, NY: Martin B. Brown Press.

Unknown Author. 1919. "Disinfection of Water Supplies." *Municipal Journal and Public Works*, 46(24): 437-439, 444.

### **Seattle, Washington**

Dominguez, Sarai. 2011. "Why Seattle's Tap Water Is So Good." *Seattle Magazine*. Available at: <https://www.seattlemag.com/article/why-seattle-s-tap-water-so-good>.

Lamb, John. 1914. *The Seattle Municipal Water Plant*. Seattle: Moulton Printing Company.

Laws, Edward A. 2000. *Aquatic Pollution: An Introductory Text* (3rd edition). New York: John Wiley and Sons.



Wilma, David. 2000. "Metro (Seattle) Dedicates West Point Treatment Plant on July 20, 1966." *HistoryLink.org*, Essay 2732. Available at: <http://www.historylink.org/File/2732>.

### **St. Louis, Missouri**

Cutler, David M. and Grant Miller. 2005. "The Role of Public Health Improvements in Health Advances: The Twentieth-Century United States." *Demography*, 42(1): 1-22.

Mohlman, F. W. 1940. "Sewage Treatment in Large American Cities." *Sewage Works Journal*, 12(1): 168-171.

National Research Council of the National Academies. 2008. *Mississippi River Water Quality and the Clean Water Act*. Washington, D.C.: National Academies Press.

Wall, Edward E. 1920. "Water Treatment at St. Louis Mo." *American Journal of Public Health*, 10(5): 437-443.

### **St. Paul, Minnesota**

Jensen, Bob. 2016. "A Drink of Water." *LillieNews.com*, August 3. Available at: <http://www.lillienews.com/articles/2016/08/03/drink-water>.

Mohlman, F. W. 1940. "Sewage Treatment in Large American Cities." *Sewage Works Journal*, 12(1): 168-171.

Saint Paul (MN). 1938. *Annual Report of the Commissioner of Public Works*. Saint Paul, MN: Department of Public Works

Unknown Author. 1914. "St. Paul, Minn., Water Report for 1913." *Fire and Water Engineering*, 56(2): 20.

### **Washington, D.C.**

Cosby, Spencer. 1909. "The Water Supply of Washington" In (editor, John H. Walker) the *Purification of the Washington Water Supply* (3rd edition), Washington, D.C.: Government Printing Office, Chapter 8, pp. 260-265.

Mohlman, F. W. 1940. "Sewage Treatment in Large American Cities." *Sewage Works Journal*, 12(1): 168-171.

Parker, Horatio N. 1907. "Stream Pollution, Occurrence of Typhoid Fever, and the Character of Surface Waters in the Potomac Basin." *Water-Supply and Irrigation Papers of the United States*, Paper No. 192: 191-290.

Penn, James R. 2001. *Rivers of the World: A Social, Geographical, and Environmental Sourcebook*. Santa Barbara, CA: ABC-CLIO, Inc.

United States Engineer Office, War Department. 1939. The Washington Aqueduct Water Supply, District of Columbia. Available at: <http://www.waterworkshistory.us/DC/Washington/>

1939Aqueduct.pdf.

Unknown Author. 1978. "Blue Plains Treatment Plant, Washington D.C." *Journal Water Pollution Control Federation*, 50(5): 997-998, 315a, 317a.

## Appendix Table 5. Bacteriological Standards for Milk, 1900-1930

| City and State             | Bacteriological Standard <sup>a</sup> |
|----------------------------|---------------------------------------|
| Baltimore, Maryland        | 1913                                  |
| Boston, Massachusetts      | 1905                                  |
| Buffalo, New York          | 1918                                  |
| Chicago, Illinois          | 1909                                  |
| Cincinnati, Ohio           | 1914                                  |
| Cleveland, Ohio            | 1906                                  |
| Detroit, Michigan          | 1915                                  |
| Indianapolis, Indiana      | 1916                                  |
| Jersey City, New Jersey    | 1915                                  |
| Kansas City, Missouri      | 1910                                  |
| Los Angeles, California    | 1905                                  |
| Milwaukee, Wisconsin       | 1908                                  |
| Minneapolis, Minnesota     | 1907                                  |
| Newark, New Jersey         | 1913                                  |
| New Orleans, Louisiana     | 1923                                  |
| New York, New York         | 1912                                  |
| Philadelphia, Pennsylvania | 1915                                  |
| Pittsburgh, Pennsylvania   | 1910                                  |
| Providence, Rhode Island   | 1915                                  |
| Rochester, New York        | 1907                                  |
| San Francisco, California  | 1909                                  |
| Seattle, Washington        | 1910                                  |
| St. Louis, Missouri        | 1923                                  |
| St. Paul, Minnesota        | 1907                                  |

<sup>a</sup> **Baltimore, MD:** On October 15, 1912, Baltimore passed an ordinance setting a bacteriological standard, but the first milk inspectors did not start working until January 1, 1913. **Boston, MA:** On March 1, 1905, the Boston Board of Health (in conjunction with the State Board of Health) set a bacteriological standard for health inspectors to follow. On January 8, 1913, Boston passed an ordinance that required licensing of milk producers and set a bacteriological standard. **Buffalo, NY:** The Buffalo Health Commissioner conducted bacteriological tests of milk as early as 1907, but standards were not set by law until October 9, 1918. **Chicago, IL:** The Chicago milk ordinance that came into effect on January 1, 1909 was nullified by the Illinois legislature on June 12, 1911. A new ordinance, passed on August 14, 1912, required that non-pasteurized milk come from tuberculin-tested cows and meet a bacteriological standard. On July 22, 1916, the Chicago Commissioner of Health required that all milk be pasteurized. **Detroit, MI:** An ordinance required that all milk sold in Detroit be pasteurized as of May 1, 1915. **Philadelphia, PA:** As of October 15, 1909, dairy farmers were required to have a license. Although inspections were conducted under rules set by the Board of Health, a bacteriological standard was not enforced until July 1, 1915.

Notes: Identification of the *Bacteriological Standard* indicator comes from the cities that began requiring that milk sold within their limits meet a bacteriological standard during the period 1910-1930.

## Sources for Appendix Table 5

### **Baltimore, Maryland**

Blanck, Fred. 1913. "Report of the Chemical Laboratory." *Annual Report Department of Public Safety*, Sub-Department of Health to the Mayor and City Council of Baltimore for the Fiscal Year Ended December 31, 1912. Baltimore, MD: Meyer and Thalheimer, p. 511-558.

City of Baltimore. 1943. *One Hundred and Twenty-Ninth Annual Report of the Department of Health*. Baltimore, MD: Department of Health.

Early, Floyd R. 1925. "Restrictions of Milk Production in Different Large Cities in the East." *Milk Products Review*, 6(3): 8.

Steffens, D.H. 1913. "Some Weaknesses of the City Inspection Theory." *The Creamery and Milk Plant Monthly*, 1(10): 1-6.

Wessel, Joyce E. 1984. "Baltimore's Dairy Industry and the Fight for Pure Milk, 1900-1920." *Business and Economic History*, 13 (Papers presented at the thirtieth annual meeting of the Business History Conference), pp. 150-157.

### **Boston, Massachusetts**

Jordan, James O. 1907. "Boston's Campaign for Clean Milk." *Journal of American Medical Association*, 49: 1082-1087.

Massachusetts (State Board of Health). 1912. *The State Board of Health of Massachusetts: A Brief History of its Organization and its Work, 1869-1912*. Boston, MA: Wright and Potter Printing Company, State Printers.

Prescott, Samuel C. 1906. "The Production of Clean Milk as a Practical Proposition" *Maryland Medical Journal*, 49(6): 208-281.

Rosenau, Milton J. 1908. "The Number of Bacteria in Milk and the Value of Bacterial Counts." In *Milk and its Relation to the Public Health*, Washington, D.C.: Government Printing Office, pp. 429-453.

United States Public Health Service. 1946. *List of American Municipalities with Compulsory Pasteurization*. Washington D.C.: U.S. Public Health Service, Sanitary Engineering Division, Milk and Food Section.

Unknown Author. 1943. "Curtains for Raw Milk." *New England Journal of Medicine*, 229(20): 765.

### **Buffalo, New York**

Baker, Moses M. 1910. "The Economic and Sanitary Supervision of City Milk Supplies." *Statistics of Cities Having a Population of Over 25,000: 1907*. Washington, D.C.: Government Printing Office, pp. 36-45, 450.

Mangold, George B. 1908. "Infant Mortality in the American Cities." *Annals of the American Academy of Political and Social Science*, 31(2): 484-494.

Wende, Ernest. 1908. "The Bulletin's Mission." *The Buffalo Sanitary Bulletin*, 1(1): 1-4.

### **Chicago, Illinois**

Czaplicki, Alan. 2007. "Pure Milk Is Better Than Purified Milk": Pasteurization and Milk Purity in Chicago, 1908-1916." *Social Science History*, 31(3): 411-433

Eastman, Francis. 1912. *Chicago City Manual 1912*. Chicago, IL: Bureau of Statistics and Municipal Library.

Fuchs, A. W. and L.C. Frank. 1938. "Milk Supplies and Their Control in American Urban Communities of Over 1,000 Population in 1936." *Public Health Bulletin, No. 245*. Washington D.C.: U.S. Public Health Service.

Olmstead, Alan and Paul Rhode. 2004. "An Impossible Undertaking: The Eradication of Bovine Tuberculosis in the United States." *Journal of Economic History*, 64(3): 734-772.

Rose, James A. 1914. "Dairy Animals – Tuberculin Test." *Bulletin of the Chicago Tuberculosis Institute*, Series 2, No. 8.

Ward, Archibald Robinson and Myer Edward Jaffa. 1909. *Pure Milk and the Public Health: A Manual of Milk and Dairy Inspection*. Ithaca, NY: Taylor and Carpenter, pp. 200-205.

### **Cincinnati, Ohio**

Blume, R.B. 1922. "Report of the Medical Milk Commission of the Cincinnati Academy of Medicine." Proceedings of the American Association of Medical Milk Commissions and Certified Milk Producers Association of America. Chicago, IL: American Association of Medical Milk Commissions, pp. 282-286.

Cincinnati (OH). 1913. "Milk. Production, Care, and Sale." *Public Health Reports (1896-1970)*, 28(14): 672-677.

Mangold, George B. 1908. "Infant Mortality in the American Cities." *Annals of the American Academy of Political and Social Science*, 31(2): 484-494.

United States Public Health Service. 1915. *Municipal Ordinances, Rules, and Regulations Pertaining to Public Health*. Washington, D.C.: Washington Government Printing Office, pp. 240-241.

United States Public Health Service. 1946. *List of American Municipalities with Compulsory Pasteurization*. Washington D.C.: U.S. Public Health Service, Sanitary Engineering Division, Milk and Food Section.

Unknown Author. 1949. "City's Main Source Closed for Certified Grade Milk at End of Month, is Word." *Cincinnati Enquirer*, September 16, p. 12.

### **Cleveland, Ohio**

Cleveland (OH). 1915. "Milk and Milk Products. Production, Care, and Sale. Bureau of Dairy and Food Inspection Created." *Public Health Reports*, 30(46): 3380-3387.

Commission of Publicity and Efficiency. 1919. "Does Regulation Increase the Price of Milk?" *Toledo City Journal*, 4(7): 104.

Lane, C.B. and Ivan C. Weld. 1908. "A City Milk and Cream Contest as a Practical Method of Improving the Milk Supply." *Bureau of Animal Industry Circular 117*. Washington D.C.: Government Printing Office.

Milk Commission of the City of Cleveland. 1906. "Report of the Milk Commission of the City of Cleveland, December 1906." *Cleveland Medical Journal*, 6(1): 31-38.

Mowry, Don E. 1908. "Milk Regulation in the Larger Cities." *Municipal Journal and Engineer*, 25(2): 55.

### **Detroit, Michigan**

Clement, Clarence Elbert and Gustav Paul Warber. 1918. "The Market Milk Business of Detroit, Mich., in 1915" United States Department of Agriculture Bulletin No. 639 (February 15).

Kiefer, Guy L. 1911. "Report of the Milk Inspector." *Thirtieth Annual Report of the Board of Health of the City of Detroit for the Fiscal Year Ending June 30, 1911*. Detroit, MI: Board of Health, pp. 94-106.

### **Indianapolis, Indiana**

City of Indianapolis (IN) 1940. "Regular Meeting, Monday August 19." *Journal of the Common Council of the City of Indianapolis, Indiana*, pp. 469-580.

United States Public Health Service. 1917. *Public Health Reports*, 31 (Part 2), Washington, D.C.: Washington Government Printing Office, pp. 2130-2134.

United States Public Health Service. 1946. *List of American Municipalities with Compulsory Pasteurization*. Washington D.C.: U.S. Public Health Service, Sanitary Engineering Division, Milk and Food Section.

### **Jersey City, New Jersey**

Gray, Thomas N. 1913. "Infant Mortality." *Journal of the Medical Society of New Jersey*, 10(1): 3-9.

United States Public Health Service. 1917. *Municipal Ordinances, Rules, and Regulations Pertaining to Public Health, 1915*. Washington DC: Washington Government Printing Office, pp. 291-296.

### **Kansas City, Missouri**

Baker, Moses M. 1910. "The Economic and Sanitary Supervision of City Milk Supplies." *Statistics of Cities Having a Population of Over 25,000: 1907*. Washington, D.C.: Government Printing Office, pp. 36-45.

Treasury Department, United States. 1912. *Municipal Ordinances, Rules, and Regulations Pertaining to Public Hygiene*. Washington, D.C.: Washington Government Printing Office, pp. 102-105

United States Public Health Service. 1916. *Public Health Reports*, 31 (Part 1), Washington, D.C.: Washington Government Printing Office, pp. 34-46.

### **Los Angeles, California**

Koslow, Jennifer. 2004. "Putting It to a Vote: The Provision of Pure Milk in Progressive Era Los Angeles." *The Journal of the Gilded Age and Progressive Era*, 3(2); 111-144.

Leonard, E.L. 1905. "City Bacteriologist's Report." *Annual Report of the City Auditor of the City of Los Angeles, California for the Year Ending November 30, 1905*.

Jackley, J.G. 1920. "Tuberculosis Eradication Work in California." *The Pacific Dairy Review*, 26(8): 8-9.

### **Louisville, Kentucky**

Baker, Moses M. 1910. "The Economic and Sanitary Supervision of City Milk Supplies." *Statistics of Cities Having a Population of Over 25,000: 1907*. Washington, D.C.: Government Printing Office, pp. 36-45.

United States Department of Agriculture. 1953. *The Marketing of Milk in the Louisville Area Under Federal Regulation*. Marketing Research Report No. 43, Washington, D.C.: Government Printing Office.

### **Milwaukee, Wisconsin**

Baker, Moses M. 1910. "The Economic and Sanitary Supervision of City Milk Supplies." *Statistics of Cities Having a Population of Over 25,000: 1907*. Washington, D.C.: Government Printing Office, pp. 36-45.

Mangold, George B. 1908. "Infant Mortality in the American Cities." *Annals of the American Academy of Political and Social Science*, 31(2): 484-494.

### **Minneapolis, Minneapolis**

Baker, Moses M. 1910. "The Economic and Sanitary Supervision of City Milk Supplies." *Statistics of Cities Having a Population of Over 25,000: 1907*. Washington, D.C.: Government Printing Office, pp. 36-45.

Minneapolis (MN). 1917. *Annual Report of the Health Department*. Minneapolis, MN: Syndicate Printing Company, p. 83.

Minneapolis (MN), City Council. 1919. Proceedings of the City Council of the City of Minneapolis from January 1, 1919 to January 1, 1920, Volume 45, pp. 364-365.

Minneapolis (MN), City Council. 1907. Proceedings of the City Council of the City of Minneapolis from January 1, 1907 to January 1, 1908, Volume 33, pp. 553-556.

### **Newark, New Jersey**

Gray, Thomas N. 1913. "Infant Mortality." *Journal of the Medical Society of New Jersey*, 10(1): 3-9.

Newark (NJ), Mayor. 1915. "The Mayor's Message Together with the Reports of the City Officers of the City of Newark, NJ." Newark, NJ: Daily Advertiser Office.

United States Congress, House Committee on the District of Columbia. 1921. Sale of Milk, Cream, and Certain Milk Products in the D.C.: Hearings Before the Subcommittee on the District of Columbia, Part 1, House of Representatives. Washington, D.C.: Government Printing Office, p. 39.

### **New Orleans, Louisiana**

Maes, Urban. 1910. "Report of the Milk Commission of the New Orleans Pure Milk Society." *Proceedings of the Fourth Annual Conference of the American Association of Medical Milk Commissions*, 4: 41-43.

New Orleans (LA), Board of Health 1922. "The Following Resolution was Passed at a Regular Meeting of the Board of Health for the Parish of Orleans and the City of New Orleans, October 11." *Monthly Bulletin, Municipal Health Department*, 10(11).

Tuley, Henry Enos. 1915. "President's Address." Proceedings of the Sixth, Seventh, and Eighth Annual Conferences of the American Association of Medical Milk Commissions, Volumes 6-8, pp. 89-93.

United States Public Health Service. 1946. *List of American Municipalities with Compulsory Pasteurization*. Washington D.C.: U.S. Public Health Service, Sanitary Engineering Division, Milk and Food Section.

Unknown Author. 1925. "Hefferman Says Monroe Needing Milk Inspector." *The Monroe News-Star*, January 21, p. 3.

### **New York, New York**

Baker, Moses M. 1910. "The Economic and Sanitary Supervision of City Milk Supplies." *Statistics of Cities Having a Population of Over 25,000: 1907*. Washington, D.C.: Government Printing Office, pp. 36-45 (and page 450).

New York (NY). 1912. "Milk. Production, Care, and Sale. With Special Reference to Pasteurization." *Public Health Reports (1896-1970)*, 27(12): 434-438.



New York (NY), Department of Health. 1913. *Weekly Bulletin of the Department of Health of the City of New York*, 2(44): 1-3.

United States Public Health Service. 1946. *List of American Municipalities with Compulsory Pasteurization*. Washington D.C.: U.S. Public Health Service, Sanitary Engineering Division, Milk and Food Section.

Unknown Author. 1943. "New York City Certified Milk to be Pasteurized." *American Journal of Public Health*, 33 (October): 1305.

### **Philadelphia, Pennsylvania**

Beard, Charles Austin. 1913. "Notes and Events." *National Civic Review*, 2(4): 675-719.

Early, Floyd R. 1925. "Restrictions of Milk Production in Different Large Cities in the East." *Milk Products Review*, 6(3): 8.

Gittings, J.C. 1922. "Report of the Milk Commission of the Philadelphia Pediatric Society" Proceedings of the American Association of Medical Milk Commissions and Certified Milk Producers Association of America. Chicago, IL: American Association of Medical Milk Commissions, pp. 463-465.

Henry Phipps Institute. 1915. "Food Inspection Service in Philadelphia." *Report of the Henry Phipps Institute*, 12: 57-94.

Mowry, Don E. 1908. "Milk Regulation in the Larger Cities." *Municipal Journal and Engineer*, 25(2): 55.

Philadelphia, PA, Department of Public Health. 1931. *Quarterly Bulletin of the Department of Public Health of the City of Philadelphia*. Philadelphia, PA.

### **Pittsburgh, Pennsylvania**

Pittsburgh City Council. 1911. Municipal Record. Minutes of the Proceedings of the Select Council of the City of Pittsburgh for the Years 1910-1911, Volume 43. Pittsburgh, PA: Devine and Co., pp. 212-215.

Edwards, Ogden M. 1910. "Report of the Milk Commission of the Allegheny County Medical Society of Pittsburgh, PA." *Proceedings of the Fourth Annual Conference of the American Association of Medical Milk Commissions*, 4: 44-50.

United States Public Health Service. 1946. *List of American Municipalities with Compulsory Pasteurization*. Washington D.C.: U.S. Public Health Service, Sanitary Engineering Division, Milk and Food Section.

Unknown Author. 1942. "Ban on Raw Milk Voted by Council." *The Pittsburgh Press*, June 23, p. 21.

### **Providence, Rhode Island**

Providence, RI. 1916. *Resolutions and Ordinances of the City Council of the City of Providence*. Providence, RI: Providence Printing Company, pp. 166-173.

### **Rochester, New York**

Goler, G.W. 1919. "Control of the Milk Supply by the Rochester Milk Department." *Report of the Rochester Milk Survey*, pp. 160-175.

Groenewold, Ellen. 1908. "Milk Supply and Public Health." *NDQ: North Dakota Quarterly*, 8: 239-254.

Mowry, Don E. 1908. "Milk Regulation in the Larger Cities." *Municipal Journal and Engineer*, 25(2): 55.

Rochester (NY), Common Council. 1922. *Record of the Proceedings of the Common Council of the City of Rochester*. Rochester, NY: Rochester Herald Company, p. 350.

### **San Francisco, California**

Hutshing, E.E. 1913. "The Milk Supply of San Francisco and its Bacterial Content." *California State Journal of Medicine*, 11(1): 14-17.

San Francisco (CA). 1910. *San Francisco Municipal Reports for the Fiscal Year 1908-9*. San Francisco, CA: Neal Publishing Company.

San Francisco (CA). 1915. *Ordinances Relating to the Preservation of Public Health, Regulation of Hospitals, Prevention of Disease, Preparation of Food, and Regulation of Places where Food is Offered for Sale*, pp. 25-33.

Skelly, Al. 1944. "Concerning San Francisco Ordinance Requiring Pasteurization of Milk." *California and Western Medicine*, 60(6): 355.

United States Public Health Service. 1917. *Municipal Ordinances, Rules, and Regulations Pertaining to Public Health*. Washington, D.C.: Washington Government Printing Office, pp. 160-173.

United States Public Health Service. 1946. *List of American Municipalities with Compulsory Pasteurization*. Washington D.C.: U.S. Public Health Service, Sanitary Engineering Division, Milk and Food Section.

### **Seattle, Washington**

Glover, M.W. 1909. "Statement of the Sanitary Condition of Seattle, Wash." *Public Health Reports*, 24(51): 1899-1939.

Bagley, Clarence B. 2017. *History of Seattle, Volume 2*. Altenmünster, Germany: Jazzybee Verlag.

**St. Louis, Missouri**

Baker, Moses M. 1910. "The Economic and Sanitary Supervision of City Milk Supplies." *Statistics of Cities Having a Population of Over 25,000: 1907*. Washington, D.C.: Government Printing Office, pp. 36-45.

Board of Aldermen of the City of St. Louis. 1921. "An Ordinance to Regulate the Production and Sale of Milk, Cream, and Ice Cream, and for Other Purposes." *The City Journal*, 4(17): 16-17.

Brown, C.A. 1928. *Costs and Margins and Other Related Factors in the Distribution of Fluid Milk in Four Illinois Markets*. University of Illinois, Bulletin Number 318: Urbana, IL.

Unknown Author. 1922. "News from Far and Near." *The Milk Dealer: The National Journal for the City Milk Trade*, 11(12): 101-104.

**St. Paul, Minnesota**

Baker, Moses M. 1910. "The Economic and Sanitary Supervision of City Milk Supplies." *Statistics of Cities Having a Population of Over 25,000: 1907*. Washington, D.C.: Government Printing Office, pp. 36-45.

Mowry, Don E. 1908. "Milk Regulation in the Larger Cities." *Municipal Journal and Engineer*, 25(2): 55.

**Washington, D.C.**

Dahlberg, Arthur Chester, H.S. Adams and M.E. Held. 1953. *Sanitary Milk Control and Its Relation to the Sanitary, Nutritive, and Other Qualities of Milk*. Washington D.C.: National Academy of Sciences.

United States Congress House Committee on the District of Columbia. 1921. *Sale of Milk, Cream, and Certain Milk Products in the District of Columbia: Hearings before the Subcommittee on the District of Columbia, House of Representatives, 67th Congress*. Washington, D.C.: Washington Government Printing Office, pp. 3-5.

**Appendix Table 6. Public Health Interventions and Summer Diarrhea by Average City Temperature**

|                                             | $\ln(\text{Diarrhea})$ |
|---------------------------------------------|------------------------|
| <i>Filtration</i> × <i>Below 30°F</i>       | -.146**<br>(.059)      |
| <i>Filtration</i> × <i>30°- 40°F</i>        | -.175***<br>(.059)     |
| <i>Filtration</i> × <i>40°- 50°F</i>        | -.183***<br>(.047)     |
| <i>Filtration</i> × <i>50°- 60°F</i>        | -.090<br>(.055)        |
| <i>Filtration</i> × <i>60°- 70°F</i>        | -.047<br>(.085)        |
| <i>Filtration</i> × <i>70°F and Above</i>   | .128<br>(.146)         |
| <i>Chlorination</i> × <i>Below 30°F</i>     | .056<br>(.057)         |
| <i>Chlorination</i> × <i>30°- 40°F</i>      | .024<br>(.063)         |
| <i>Chlorination</i> × <i>40°- 50°F</i>      | -.042<br>(.057)        |
| <i>Chlorination</i> × <i>50°- 60°F</i>      | -.098*<br>(.056)       |
| <i>Chlorination</i> × <i>60°- 70°F</i>      | -.001<br>(.056)        |
| <i>Chlorination</i> × <i>70°F and Above</i> | .048<br>(.073)         |
| N                                           | 6,552                  |
| R <sup>2</sup>                              | .862                   |

\*Statistically significant at 10% level; \*\* at 5% level; \*\*\* at 1% level.

Notes: Based on annual data from *Mortality Statistics* for the period 1910-1930, published by the U.S. Census Bureau. Each column represents the results from a separate OLS regression. The dependent variable is equal to the natural log of the number of diarrheal deaths among children under the age of two per 100,000 population in city  $c$  and month  $t$ . Controls include the city characteristics listed in Appendix Table 1, temperature indicators, interactions between the temperature indicators and the remaining public health interventions (*Clean Water Project*, *Sewage Treated*, and *Bacteriological Standard*), city fixed effects, month-by-year fixed effects, and city-specific linear trends. Regressions are weighted by city population. Standard errors, corrected for clustering at the city level, are in parentheses. Data on temperature come from the nClimDiv data set at the National Climatic Data Center (NCDC) of the National Oceanic and Atmospheric Administration (NOAA), which is available at: <ftp://ftp.ncdc.noaa.gov/pub/data/cirs/climdiv/>. Temperature is measured at the climate division-by-month level.
